# Supplementary material for: Real-Time Fluorescence Imaging of His-Tag-Driven Conjugation of mCherry Proteins to Silver Nanowires
Source: MDPI journal article supplement (doi:10.3390/chemosensors10040149), 2022-04-18
Supplement: s1 [file s1]

## Supplementary Materials

### Real-time fluorescence imaging of His-tag-driven conjugation of mCherry proteins to silver nanowires.

**Martyna Jankowska<sup>1</sup>, Karolina Sulowska<sup>1</sup>, Joanna Niedziółka-Jonsson<sup>2</sup>, Sebastian Mackowski<sup>1\*</sup>**

<sup>1</sup> Nanophotonics Group, Institute of Physics, Faculty of Physics, Astronomy and Informatics, Nicolaus Copernicus University in Torun, Grudziadzka 5, 87-100 Torun, Poland, email: mackowski@fizyka.umk.pl

<sup>2</sup> Institute of Physical Chemistry Polish Academy of Sciences, ul. Kasprzaka 44/52, 01-224 Warsaw, Poland

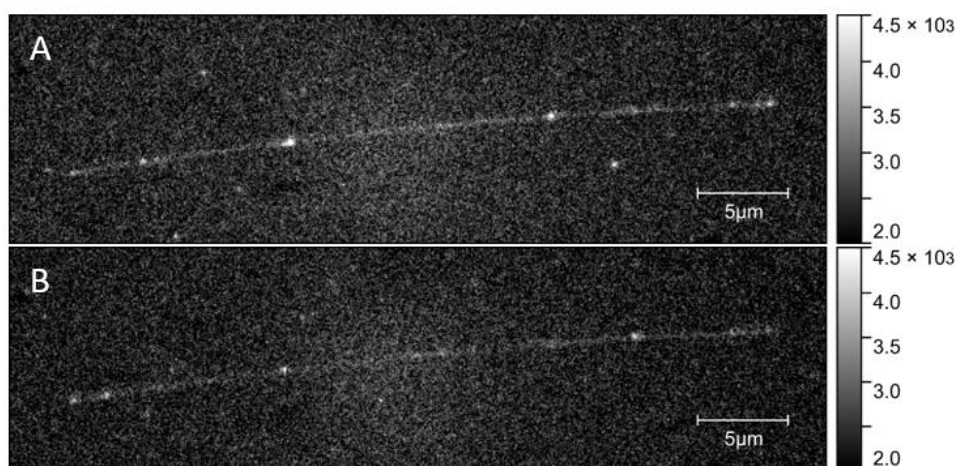

*Figure S1 Fluorescence intensity maps of single mCherry for 10 s and 185 s.*

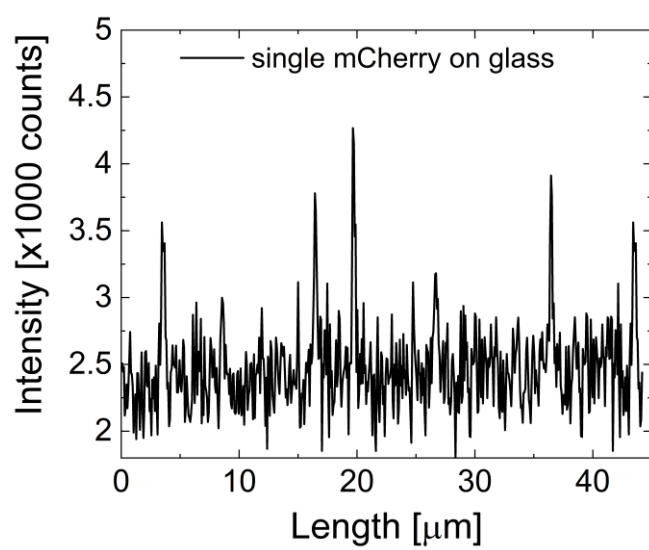

Figure S2 Cross-section of fluorescence intensity of single mCherry on glass.

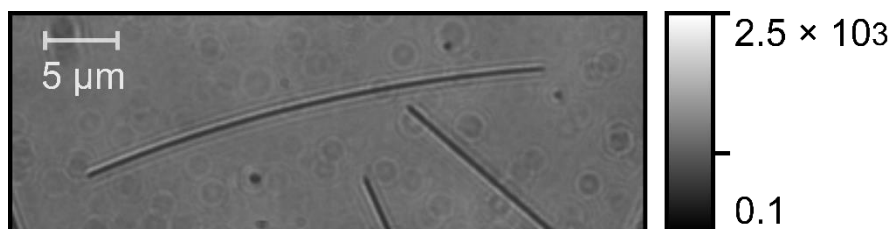

Figure S3 Transmission map for real-time imaging experiment featuring isolated silver nanowires.

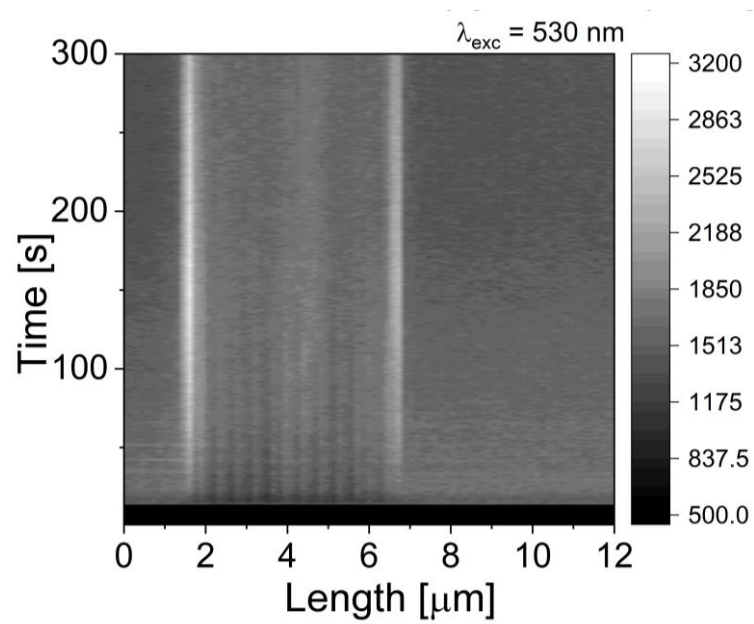

Figure S4 Transient behavior of fluorescence intensity of mCherry measured for a single AgNW.
