# Supplementary material for: Real-Time Fluorescence Imaging of His-Tag-Driven Conjugation of mCherry Proteins to Silver Nanowires
Source: MDPI journal article supplement (doi:10.3390/chemosensors10040149), 2022-04-18
Supplement: s1 [file s1]

Archive with 2 entries (2 files):
- single_mCherry_AgNWs.avi
- Supplementary Materials.pdf
